# Supplementary material for: Triarylazoimidazole-ZnII, CdII, and HgII Complexes: Structures, Photophysics, and Antibacterial Properties
Source: MDPI journal article supplement (doi:10.3390/cryst12050680), 2022-05-09
Supplement: s1 [file s1]

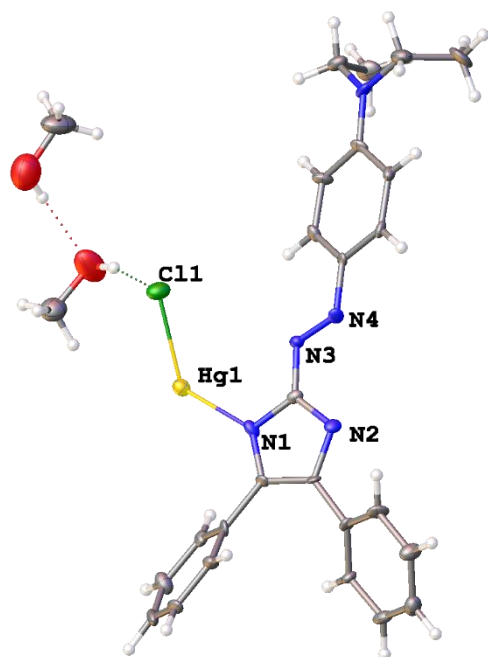

**Figure S1.** Asymmetric unit of **9Hg'** in representation of atoms with thermal ellipsoids (given at  $p = 50\%$ ).

**Table S1.** Crystallographic data and the refinement parameters for compounds.

|                                                                | <b>9Zn·CH<sub>3</sub>OH</b>                                        | <b>9Hg·CH<sub>3</sub>OH</b>                                        | <b>9Hg'·2CH<sub>3</sub>OH</b>                                     | <b>8·solvent</b>                                              | <b>10</b>                                                     | <b>10Cd·1.75CH<sub>3</sub>OH·0.75H<sub>2</sub>O</b>                                      |
|----------------------------------------------------------------|--------------------------------------------------------------------|--------------------------------------------------------------------|-------------------------------------------------------------------|---------------------------------------------------------------|---------------------------------------------------------------|------------------------------------------------------------------------------------------|
| Empirical formula                                              | C <sub>26</sub> H <sub>29</sub> Cl <sub>2</sub> N <sub>5</sub> OZn | C <sub>26</sub> H <sub>29</sub> Cl <sub>2</sub> HgN <sub>5</sub> O | C <sub>27</sub> H <sub>32</sub> ClHgN <sub>5</sub> O <sub>2</sub> | C <sub>24</sub> H <sub>22</sub> N <sub>4</sub> O <sub>3</sub> | C <sub>23</sub> H <sub>19</sub> N <sub>5</sub> O <sub>4</sub> | C <sub>47.75</sub> H <sub>46.5</sub> Br <sub>2</sub> CdN <sub>10</sub> O <sub>10.5</sub> |
| Fw                                                             | 563.81                                                             | 699.03                                                             | 694.61                                                            | 414.45                                                        | 429.43                                                        | 1200.67                                                                                  |
| Crystal system                                                 | Triclinic                                                          | Triclinic                                                          | Monoclinic                                                        | Monoclinic                                                    | Triclinic                                                     | Triclinic                                                                                |
| Space group                                                    | <i>P</i> $\bar{1}$                                                 | <i>P</i> $\bar{1}$                                                 | <i>P</i> 2 <sub>1</sub> / <i>c</i>                                | <i>P</i> 2 <sub>1</sub> / <i>c</i>                            | <i>P</i> $\bar{1}$                                            | <i>P</i> $\bar{1}$                                                                       |
| Z                                                              | 2                                                                  | 2                                                                  | 4                                                                 | 4                                                             | 2                                                             | 4                                                                                        |
| a, Å                                                           | 9.717(7)                                                           | 9.626(2)                                                           | 15.911(3)                                                         | 12.6640(15)                                                   | 9.4104(6)                                                     | 11.3012(11)                                                                              |
| b, Å                                                           | 10.537(7)                                                          | 10.547(2)                                                          | 15.480(3)                                                         | 19.273(2)                                                     | 9.4575(7)                                                     | 17.9671(18)                                                                              |
| c, Å                                                           | 14.692(13)                                                         | 14.916(3)                                                          | 11.104(2)                                                         | 9.5614(12)                                                    | 11.6949(8)                                                    | 29.382(3)                                                                                |
| $\alpha$ , °                                                   | 72.37(3)                                                           | 100.137(7)                                                         | 90                                                                | 90                                                            | 102.897(2)                                                    | 97.895(2)                                                                                |
| $\beta$ , °                                                    | 71.17(3)                                                           | 108.617(9)                                                         | 108.76(3)                                                         | 91.540(3)                                                     | 90.055(2)                                                     | 99.032(2)                                                                                |
| $\gamma$ , °                                                   | 79.99(2)                                                           | 98.811(8)                                                          | 90                                                                | 90                                                            | 91.925(2)                                                     | 102.104(2)                                                                               |
| V, Å <sup>3</sup>                                              | 1352.1(18)                                                         | 1376.8(5)                                                          | 2589.8(10)                                                        | 2332.9(5)                                                     | 1013.96(12)                                                   | 5670.9(10)                                                                               |
| D <sub>calc</sub> , g·cm <sup>-3</sup>                         | 1.385                                                              | 1.686                                                              | 1.781                                                             | 1.180                                                         | 1.407                                                         | 1.406                                                                                    |
| $\mu$ , cm <sup>-1</sup>                                       | 1.134                                                              | 5.811                                                              | 6.081                                                             | 0.080                                                         | 0.099                                                         | 1.855                                                                                    |
| F(000)                                                         | 584                                                                | 684                                                                | 1368                                                              | 872                                                           | 448                                                           | 2420                                                                                     |
| No of measured reflections                                     | 14193                                                              | 20134                                                              | 35134                                                             | 27088                                                         | 8652                                                          | 77749                                                                                    |
| No of independent reflections, R <sub>int</sub>                | 7810, 0.023                                                        | 9211, 0.030                                                        | 8182, 0.175                                                       | 7118, 0.100                                                   | 4709, 0.041                                                   | 34402, 0.159                                                                             |
| No of observed reflections with [I>2 $\sigma$ (I)]             | 6731                                                               | 8323                                                               | 4027                                                              | 3729                                                          | 2496                                                          | 13056                                                                                    |
| No of parameters                                               | 320                                                                | 320                                                                | 331                                                               | 283                                                           | 291                                                           | 1309                                                                                     |
| R <sub>1</sub> [I>2 $\sigma$ (I)]                              | 0.041                                                              | 0.025                                                              | 0.064                                                             | 0.059                                                         | 0.062                                                         | 0.082                                                                                    |
| wR <sub>2</sub> [all]                                          | 0.110                                                              | 0.066                                                              | 0.127                                                             | 0.127                                                         | 0.149                                                         | 0.185                                                                                    |
| GOF                                                            | 1.04                                                               | 1.13                                                               | 0.93                                                              | 1.01                                                          | 1.03                                                          | 1.07                                                                                     |
| $\Delta\rho_{\max}$ , $\Delta\rho_{\min}$ (e Å <sup>-3</sup> ) | 0.98/-0.60                                                         | 0.89/-1.36                                                         | 2.07/-3.07                                                        | 0.26/-0.28                                                    | 0.27/-0.26                                                    | 2.09/-2.04                                                                               |

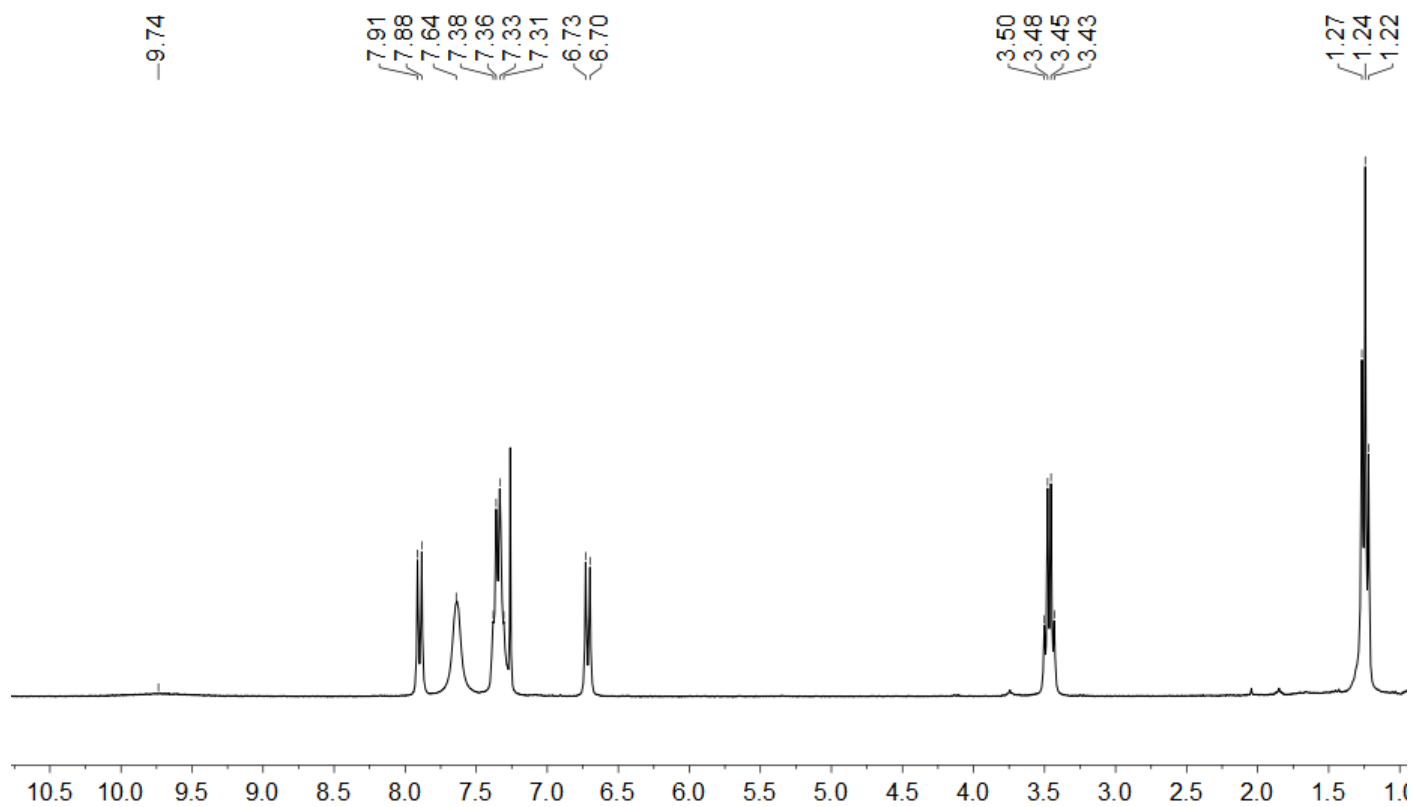

**Figure S2.** <sup>1</sup>H NMR spectrum of **9** (CDCl<sub>3</sub>).

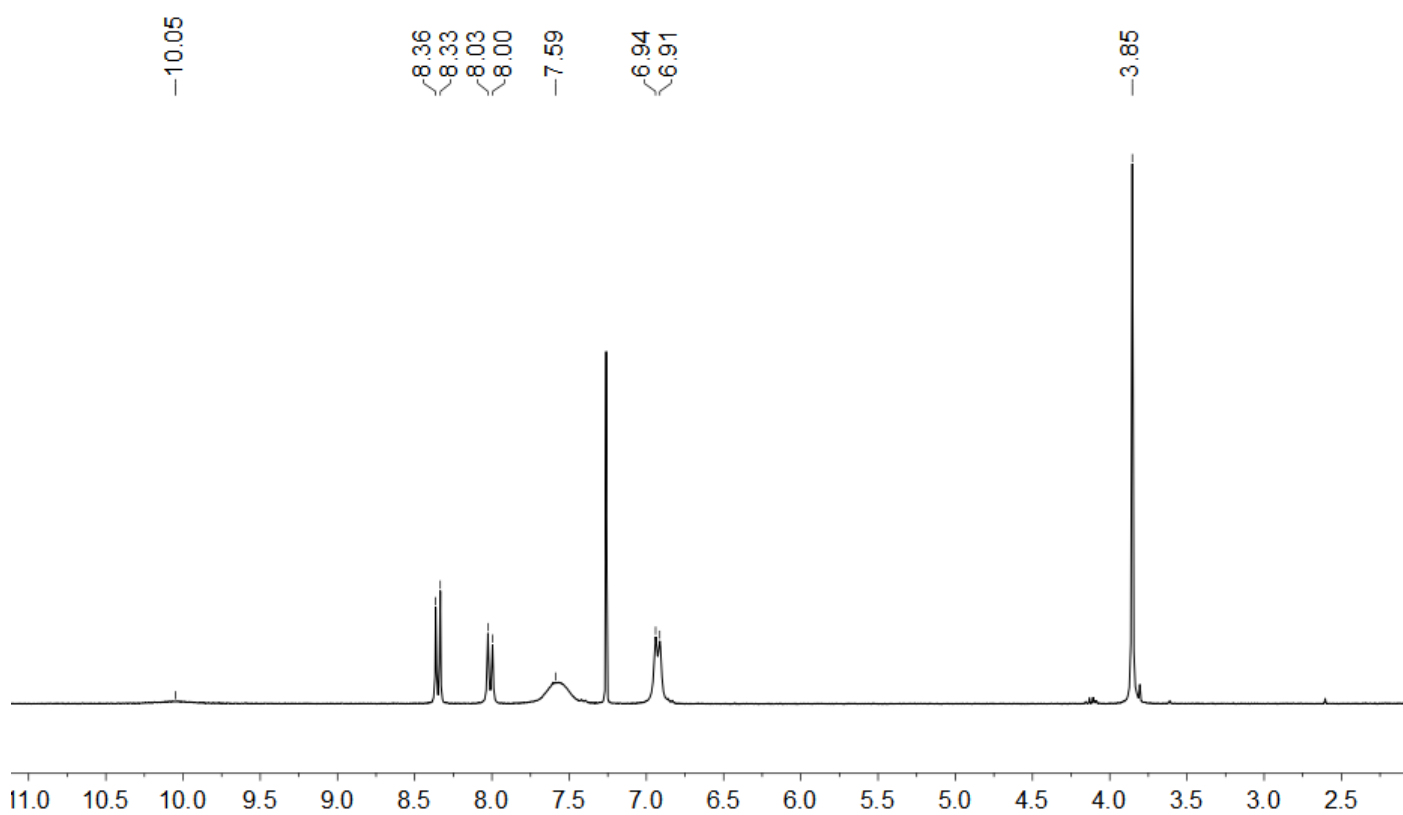

**Figure S3.** <sup>1</sup>H NMR spectrum of **10** (CDCl<sub>3</sub>).

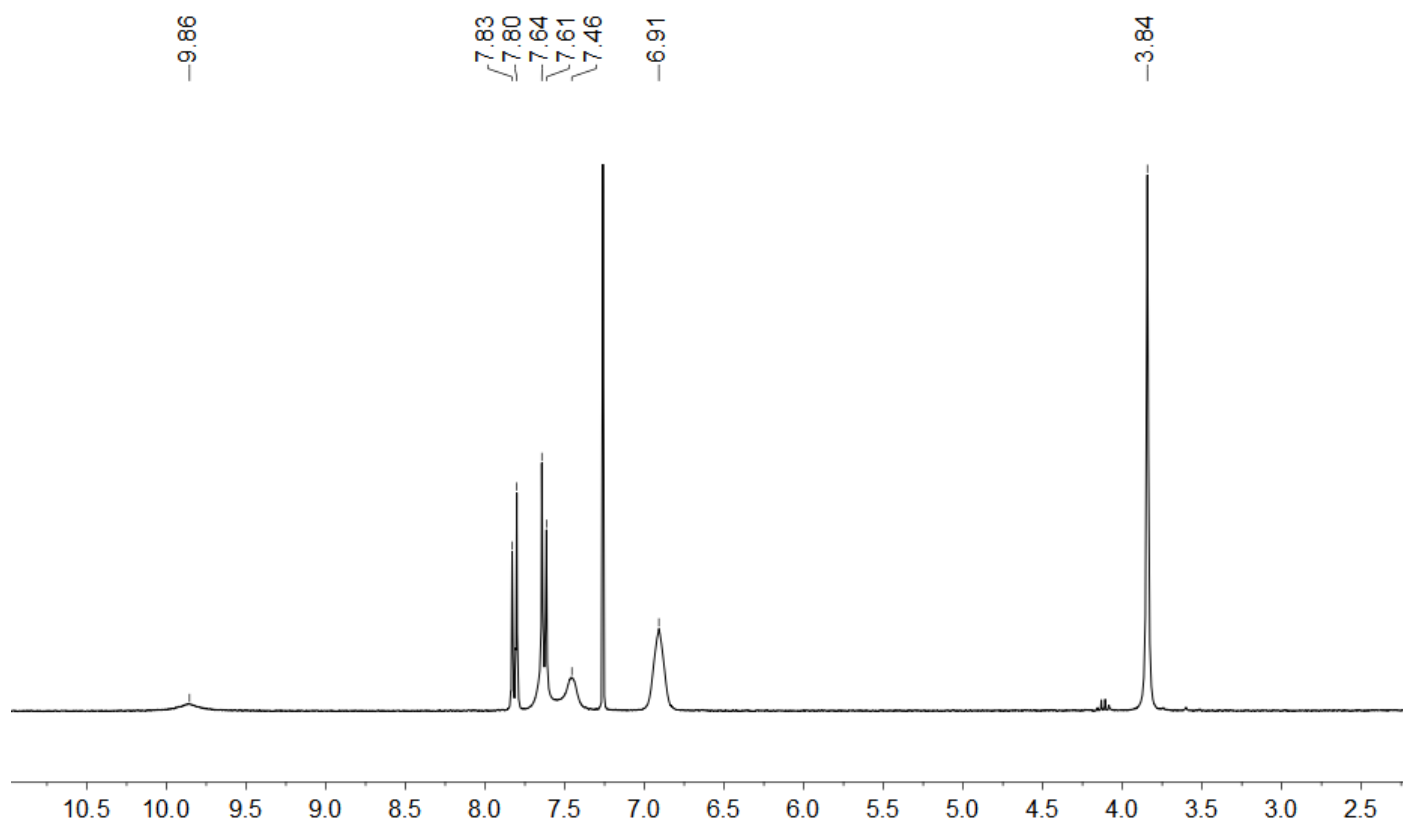

**Figure S4.**  $^1\text{H}$  NMR spectrum of **11** ( $\text{CDCl}_3$ ).
